# Supplementary material for: Depressive Symptomatology among Adolescents in Internally Displaced Persons’ Camps in Borno State, Nigeria: Effectiveness of Rational Emotive Behaviour and Client-Centred Therapies
Source: Research Square preprint supplement (doi:10.21203/rs.3.rs-8295751/v1), 2026-01-01
Supplement: Supplementary file 1 [file 91caaccc1e97dc678145bf63.xlsx]

## Sheet: CODED DATA
Rational Emotive Behaviour Therapy							Client-Centred Therapy							Control Group
S/No.	Pre-test	Post-test	Gender	HSE	HSE Cat.		S/No.	Pre-test	Post-test	Gender	HSE	HSE Cat.		S/No.	Pre-test	Post-test	Gender	HSE	HSE Cat.
1	26	5	1	36	3		1	20	6	1	32	3		1	20	22	0	18	1
2	22	8	0	22	2		2	17	12	0	18	1		2	17	16	1	32	3
3	20	7	1	32	2		3	18	5	1	31	3		3	18	17	1	22	3
4	21	10	0	18	1		4	20	11	0	20	1		4	20	19	0	26	2
5	23	8	1	24	2		5	16	5	1	34	3		5	16	17	1	28	3
6	22	9	1	22	2		6	14	6	1	32	3		6	20	18	1	32	3
7	23	4	1	36	3		7	26	6	1	34	3		7	26	22	1	30	2
8	21	7	0	28	2		8	22	10	0	27	2		8	22	18	1	14	1
9	22	3	1	32	3		9	20	11	0	28	2		9	22	20	1	31	3
10	20	8	0	30	2		10	21	10	0	32	2		10	23	16	0	32	3
11	18	11	0	14	1		11	23	10	0	26	2		11	21	14	0	20	1
12	20	10	0	16	1		12	22	5	1	32	3		12	22	26	0	22	3
13	26	3	1	31	3		13	23	10	0	30	2		13	20	22	0	34	3
14	24	10	0	20	1		14	18	6	1	34	3		14	18	20	0	24	2
15	22	8	0	22	2		15	20	10	0	25	2		15	20	21	0	22	2
16	24	3	1	34	3		16	17	5	1	32	3		16	26	23	0	20	1
17	20	7	1	24	2		17	18	6	1	31	3		17	24	18	1	27	2
18	17	4	1	32	3		18	20	10	0	36	2		18	22	20	1	28	2
19	18	7	1	28	2		19	16	6	1	32	3		19	24	17	1	22	2
20	20	8	0	27	2		20	14	5	1	24	3		20	20	18	1	16	1
21	16	8	0	28	2		21	26	13	0	20	1		21	17	20	1	18	1
22	14	6	0	24	2		22	22	4	1	34	3		22	18	16	1	26	2
23	20	2	1	34	3		23	20	13	0	22	1		23	22	14	1	36	3
24	22	4	1	32	3		24	21	12	0	15	1		24	20	26	0	22	2
25	20	3	1	32	3		25	23	11	0	20	1		25	21	22	0	14	1
26	22	6	1	22	2		26	22	10	0	32	2		26	23	20	1	20	1
27	20	10	0	16	1		27	23	12	0	18	1		27	22	21	1	22	2
28	18	9	0	18	2		28	18	5	1	31	3		28	23	23	0	12	1
29	16	10	0	20	2		29	20	6	1	32	3		29	17	16	0	16	1
30	15	8	1	24	2		30	16	12	0	18	1		30	18	17	0	20	1
		MFQ 28 - 66		QIDS-A 6 - 27
	10 – 20, 21 – 30 and 31 – 40 will be considered as low, moderate and high SEH
		Gender 0 = Male and 1 = Female
S/No.	Age Range	Religion	Age				Crosstab
1	2	1	13
2	2	1	14
3	2	2	15
4	1	2	10
5	1	2	12
6	3	2	17
7	3	2	16
8	2	2	14
9	2	2	13
10	2	2	14
11	2	1	15
12	2	1	13
13	2	1	14
14	1	1	12
15	1	1	10
16	3	1	18
17	2	1	15
18	2	1	15
19	1	2	10
20	1	2	11
21	1	2	12
22	3	2	16
23	2	2	14
24	2	2	15
25	2	1	14
26	2	1	14
27	3	1	17
28	3	1	16
29	3	2	16
30	3	2	16
31	3	2	17
32	3	2	16
33	1	2	11
34	1	2	12
35	2	2	13
36	2	2	14
37	2	2	15
38	3	2	16
39	3	2	17
40	3	2	16
41	3	2	16
42	3	2	17
43	3	2	16
44	2	1	13
45	2	1	15
46	2	2	14
47	2	2	13
48	1	2	10
49	1	2	11
50	1	2	12
51	2	2	13
52	2	2	14
53	3	2	17
54	2	2	15
55	2	2	14
56	2	2	15
57	1	2	10
58	2	2	13
59	3	2	16
60	3	2	18
61	2	2	15
62	2	2	13
63	2	2	14
64	2	1	15
65	1	2	11
66	1	2	12
67	1	2	10
68	2	2	13
69	2	1	14
70	2	2	14
71	2	2	13
72	3	2	17
73	3	1	16
74	3	2	16
75	2	2	15
76	3	2	16
77	2	1	13
78	1	2	11
79	2	2	15
80	3	2	16
81	2	2	14
82	2	1	15
83	2	1	13
84	3	2	17
85	3	2	16
86	1	2	10
87	1	2	10
88	2	1	13
89	2	2	14
90	1	2	12
